# Supplementary material
Source: PubMed Central journal article supplement (PMC5521870)
Supplement: DB161355SupplementaryData1.pdf [file DB161355SupplementaryData1.pdf]

SUPPLEMENTARY DATA

**Primary antibodies used:**

| <b>Antibody</b>        | <b>Species</b> | <b>Company</b>    | <b>Dilution</b> |
|------------------------|----------------|-------------------|-----------------|
| Aldh1a3                | Rabbit         | Novus Biologicals | 1:500           |
| GFP                    | Chicken        | Invitrogen        | 1:2000          |
| Glucagon               | Rabbit         | Linco             | 1:1000          |
| Insulin                | Guinea pig     | Invitrogen        | 1:1000          |
| Insulin                | Rabbit         | Cell Signaling    | 1:100           |
| Pancreatic polypeptide | Guinea pig     | Linco             | 1:1000          |
| Somatostatin           | Rabbit         | ICN Biomedicals   | 1:1000          |
| S100a6                 | Sheep          | R&D Systems       | 1:100           |

**qRT-PCR primer sequences:**

| <b>Gene</b>    | <b>Forward Primer</b>       | <b>Reverse Primer</b>       |
|----------------|-----------------------------|-----------------------------|
| <i>Aldh1a3</i> | 5'-GGGTCACACTGGAGCTAGGA     | 5'-CTGGCCTCTTCTTGGCGAA      |
| <i>Ascl1</i>   | 5'-GACTTTGGAAGCAGGATGGCA    | 5'-CACCCCTGTTTGCTGAGAAC     |
| <i>Hprt</i>    | 5'-TACGAGGAGTCCTGTTGATGTTGC | 5'-GGGACGCAGCAACTGACATTTCTA |
| <i>S100a4</i>  | 5'-AGCACTTCCTCTCTTGGTC      | 5'-TCATCTGTCCTTTTCCCAGG     |
| <i>S100a6</i>  | 5'-CACATTCCATCCCCTCGACC     | 5'-GTGGAAGATGGCCACGAGAA     |

SUPPLEMENTARY DATA

**Supplementary Figure 1. *Abcc8*<sup>-/-</sup> β-cells exhibit oscillations in intracellular Ca<sup>2+</sup> at sub-stimulatory glucose.** (A-B) Intracellular Ca<sup>2+</sup> was monitored in *Abcc8*<sup>-/-</sup> (A) and *Abcc8*<sup>+/+</sup> (B) intact islets with Fura-2 AM at 2mM glucose for 20 minutes. Traces from three representative islets are shown for each genotype. *Abcc8*<sup>-/-</sup> islets exhibit oscillations of variable frequency and elevated [Ca<sup>2+</sup>]<sub>i</sub>, while *Abcc8*<sup>+/+</sup> islets show no oscillatory behavior and low [Ca<sup>2+</sup>]<sub>i</sub>.

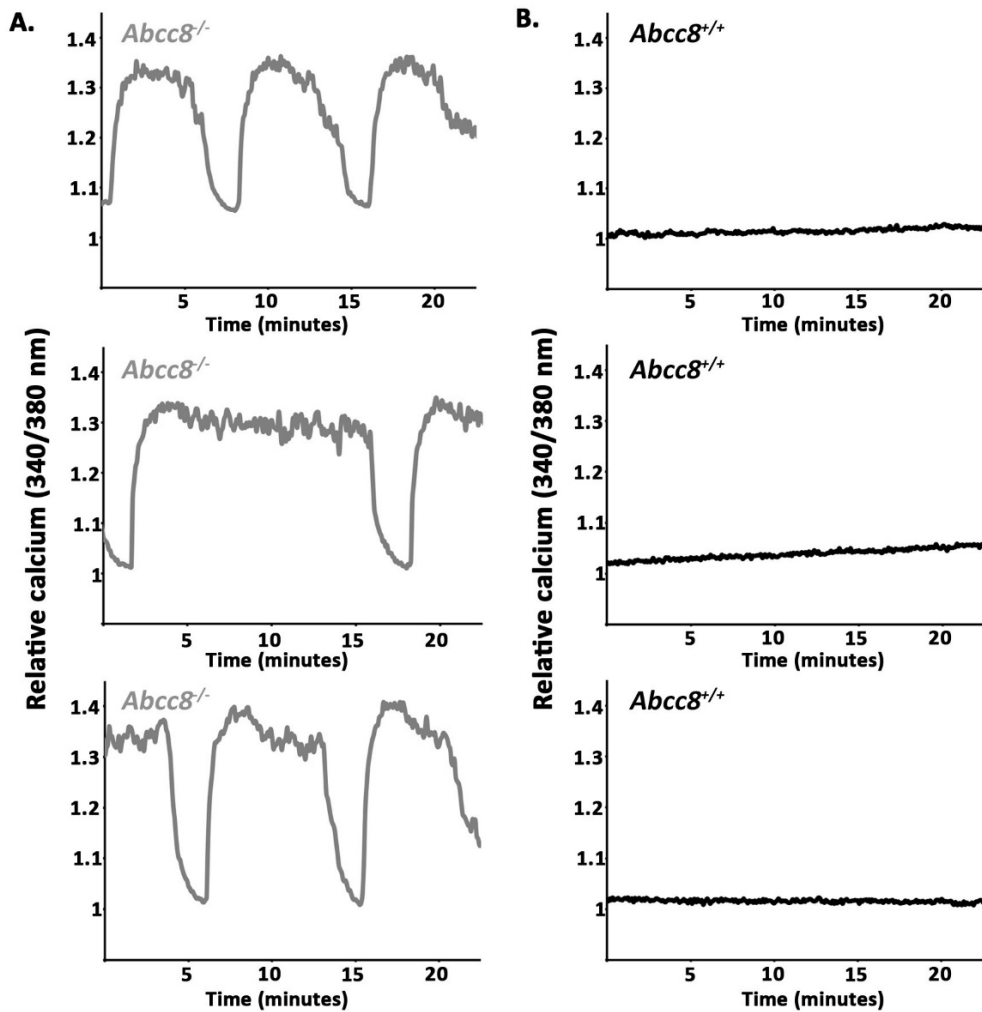

## SUPPLEMENTARY DATA

**Supplementary Figure 2. *Abcc8*<sup>-/-</sup> β-cells don't transdifferentiate to α- or δ-cells.** (A, B) We performed β-cell lineage tracing using *Abcc8*<sup>-/-</sup>; *RIP-Cre*; *R26*<sup>LSL.YFP</sup> animals and assessed β-cell dedifferentiation at 12 weeks of age. Quantification of YFP/Glucagon double<sup>+</sup> cells (A) or YFP/Somatostatin double<sup>+</sup> cells (B) shows no difference in the prevalence of these cells in wild type and knockout mice, suggesting that *Abcc8*<sup>-/-</sup> β-cells do not transdifferentiate to α- or δ-cells. N=3-4 animals, 10-15 islets counted per animal. (C) Summary of the total number of YFP and PP double-positive, but insulin-negative, cells observed in *Abcc8*<sup>+/+</sup>; *RIP-Cre*; *R26*<sup>LSL.YFP</sup> and *Abcc8*<sup>-/-</sup>; *RIP-Cre*; *R26*<sup>LSL.YFP</sup> animals at 12 weeks of age. (D) Quantification of PP/Insulin double<sup>+</sup> cells in frozen pancreatic sections shows a trend towards a decrease in polyhormonal cells in 8-9-week-old *Abcc8*<sup>-/-</sup> mice after 3 weeks of verapamil administration (p=0.26). However, the difference is not statistically significant. (E) Quantification of the number of YFP-positive, hormone-negative cells observed in *Abcc8*<sup>+/+</sup>; *RIP-Cre*; *R26*<sup>LSL.YFP</sup> and *Abcc8*<sup>-/-</sup>; *RIP-Cre*; *R26*<sup>LSL.YFP</sup> animals at 12 weeks of age. N=3 animals per group. \*p<0.05, \*\*\*p<0.001, n.s. = Not Significant.

SUPPLEMENTARY DATA

A

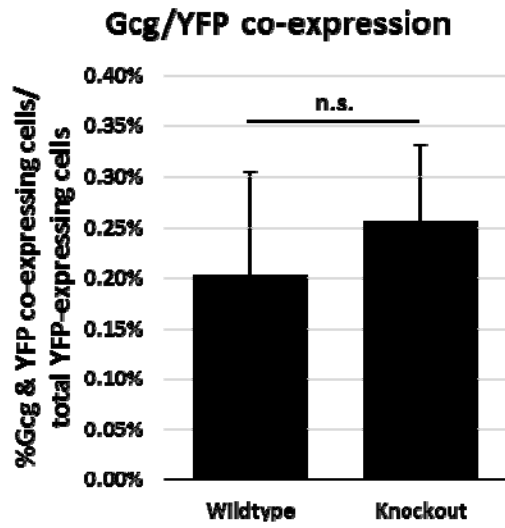

B

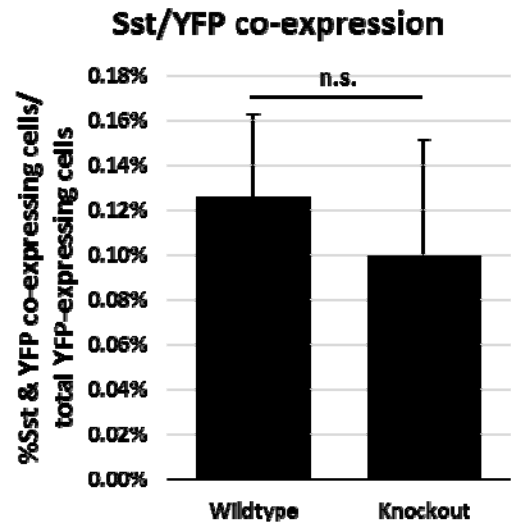

C

| Genotype | Total YFP+ cells | Total YFP/PP+ cells | Total YFP/PP+, Ins+ cells |
|----------|------------------|---------------------|---------------------------|
| Wildtype | 2585             | 8                   | 0                         |
| Knockout | 1645             | 40                  | 4                         |

D

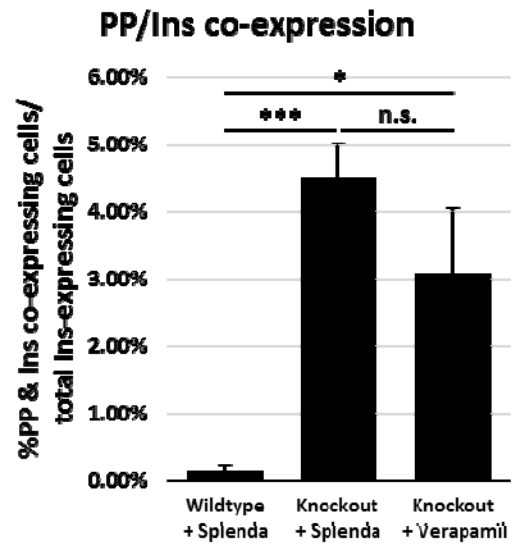

E

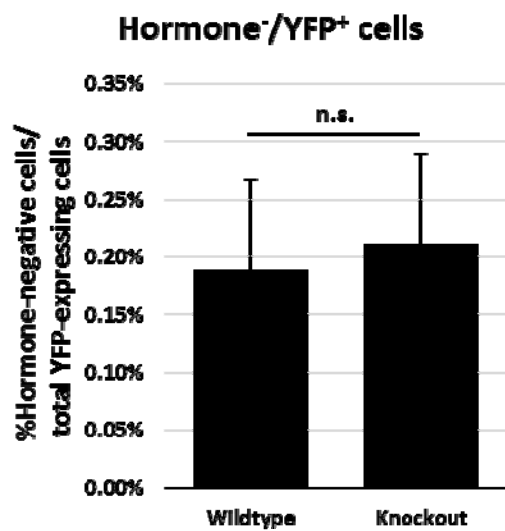

SUPPLEMENTARY DATA

**Supplementary Figure 3. Blood glucose control in *Abcc8*<sup>-/-</sup> mice.** (A) Results of intraperitoneal glucose tolerance tests on male *Abcc8*<sup>+/+</sup> and *Abcc8*<sup>-/-</sup> mice at 12 weeks of age. n=4-10 animals per genotype. Error bars represent standard error. \*p<0.05, \*\*p<0.01. (B) Fed blood glucose concentration in a cohort of *Abcc8*<sup>+/+</sup> and *Abcc8*<sup>-/-</sup> mice between from 4 to 8 weeks of age showing no statistically significant difference between the groups. n=5 animals per genotype. (C) TUNEL was used to assess β-cell death at 12 weeks of age. In *Abcc8*<sup>+/+</sup> islets, no insulin and TUNEL co-expressing cells were observed. In *Abcc8*<sup>-/-</sup> islets, one insulin and TUNEL co-expressing cell was observed.

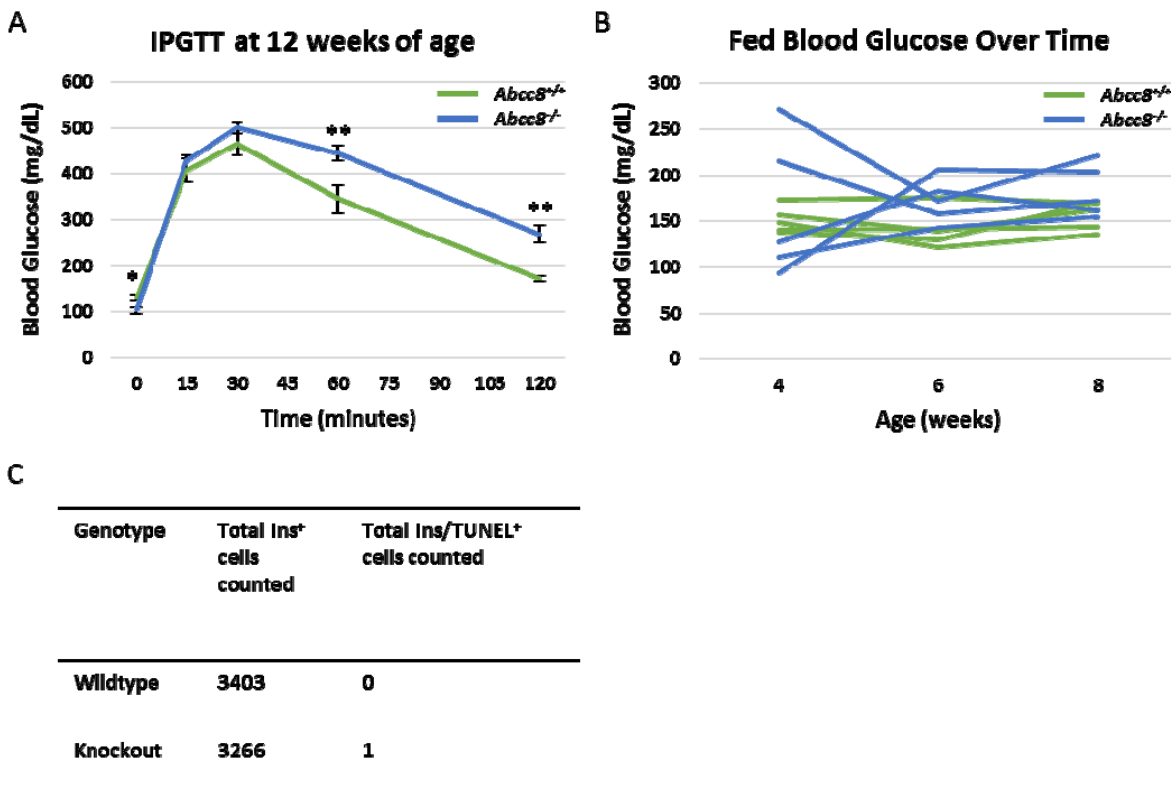

SUPPLEMENTARY DATA

**Supplementary Figure 4. Principal Component Analysis and Gene Clustering Analysis.** (A) FACS profiles of sorted populations from *Abcc8*<sup>+/+</sup>; *MIP-GFP* and *Abcc8*<sup>-/-</sup>; *MIP-GFP* mice indicating that  $\beta$ -cells from both genotypes can be purified similarly. (B) Principal component analysis shows that the eight samples used for RNA-sequencing cluster by genotype, with some variation in the second principal component. (C) Heat map depicting gene clustering analysis using the top 500 differentially-expressed genes. “WT” = *Abcc8*<sup>+/+</sup>. “KO” = *Abcc8*<sup>-/-</sup>.

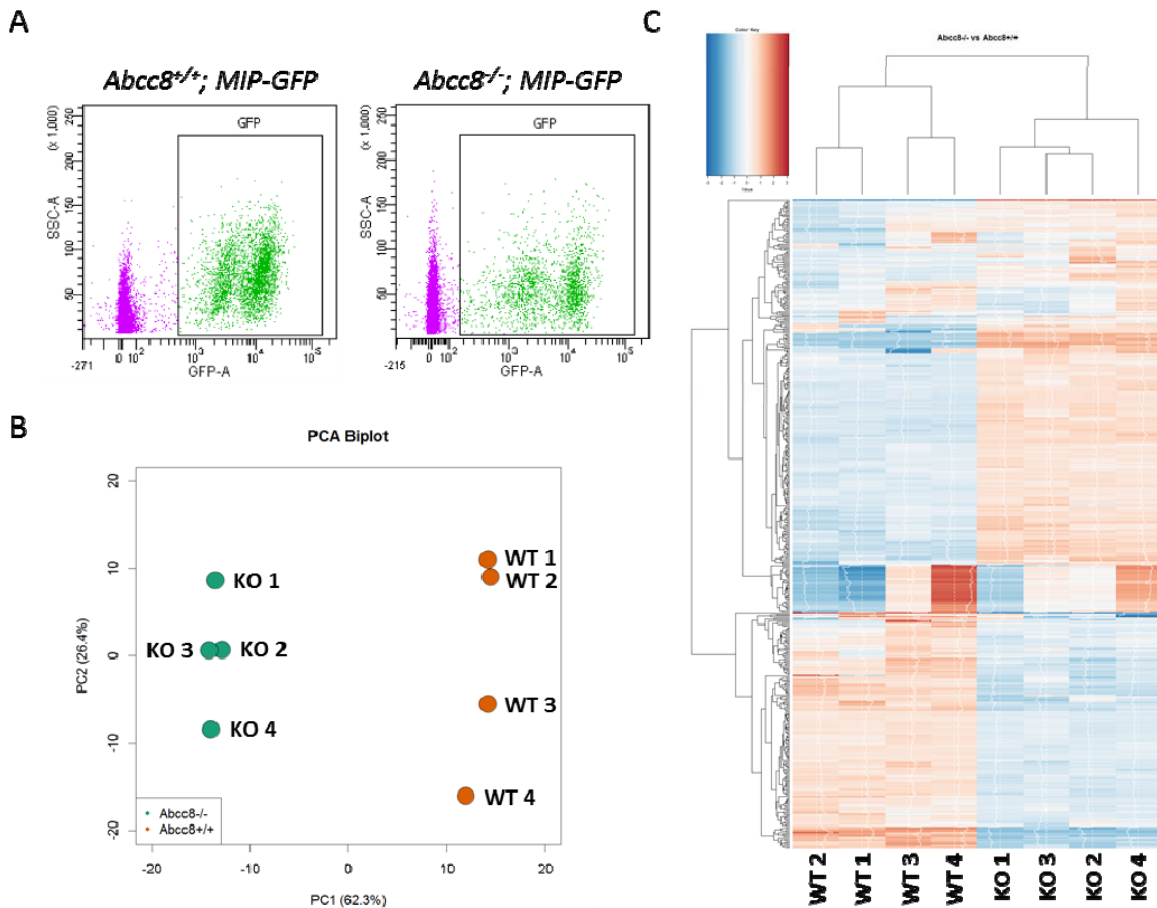

## SUPPLEMENTARY DATA

**Supplementary Figure 5. *Abcc8*<sup>-/-</sup> islets have disrupted islet morphology.** (A) *Abcc8*<sup>+/+</sup> islets maintain a clear mantle of  $\alpha$ -cells while (B) *Abcc8*<sup>-/-</sup> islets progressively lose the boundary between mantle and core between 4 and 28 weeks of age. (C-I) Cell counting at 4, 12, 20, and 28 weeks of age shows that *Abcc8*<sup>-/-</sup> islets have fewer  $\beta$ -cells (C), a greater percentage of  $\alpha$ -cells (D), PP-cells (F), and  $\delta$ -cells (H), and an increasing percentage of core  $\alpha$ -cells (E), core PP-cells (G) and core  $\delta$ -cells (I). Core cells were defined as being located greater than 2 cell diameters interior from the islet boundary. Green lines represent *Abcc8*<sup>+/+</sup> islets. Blue lines represent *Abcc8*<sup>-/-</sup> islets. n=3-4 animals per genotype, 10-15 islets counted per animal. Error bars represent standard error. \*p<0.05, \*\*p<0.01, \*\*\*p<0.001. Scale bar = 50 $\mu$ m.

SUPPLEMENTARY DATA

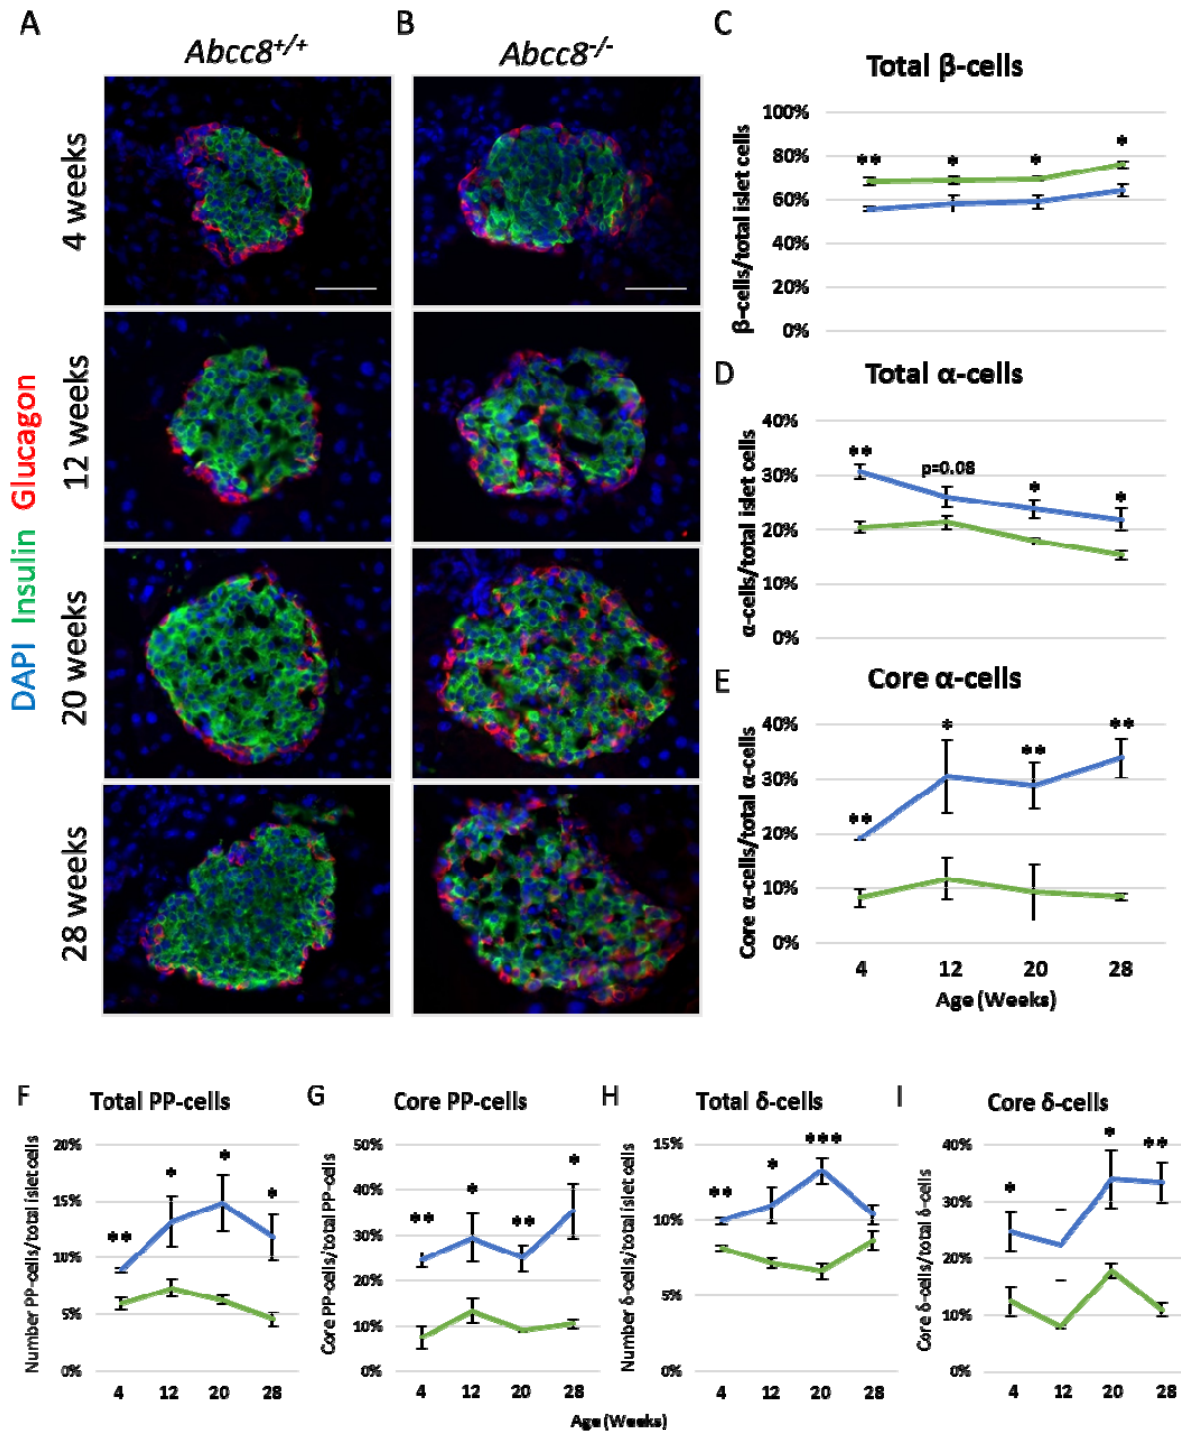



SUPPLEMENTARY DATA

**Supplementary Figure 6. iRegulon-predicted network of regulators of the top 500 upregulated genes in *Abcc8*<sup>-/-</sup> β-cells.** Map depicting the top 3 predicted regulators (green octagons) and their predicted target genes (magenta circles). A majority of the genes are predicted to be co-regulated by two or more regulators. Genes of interest (*S100a6*, *S100a4*, and *Aldh1a3*) are highlighted yellow.

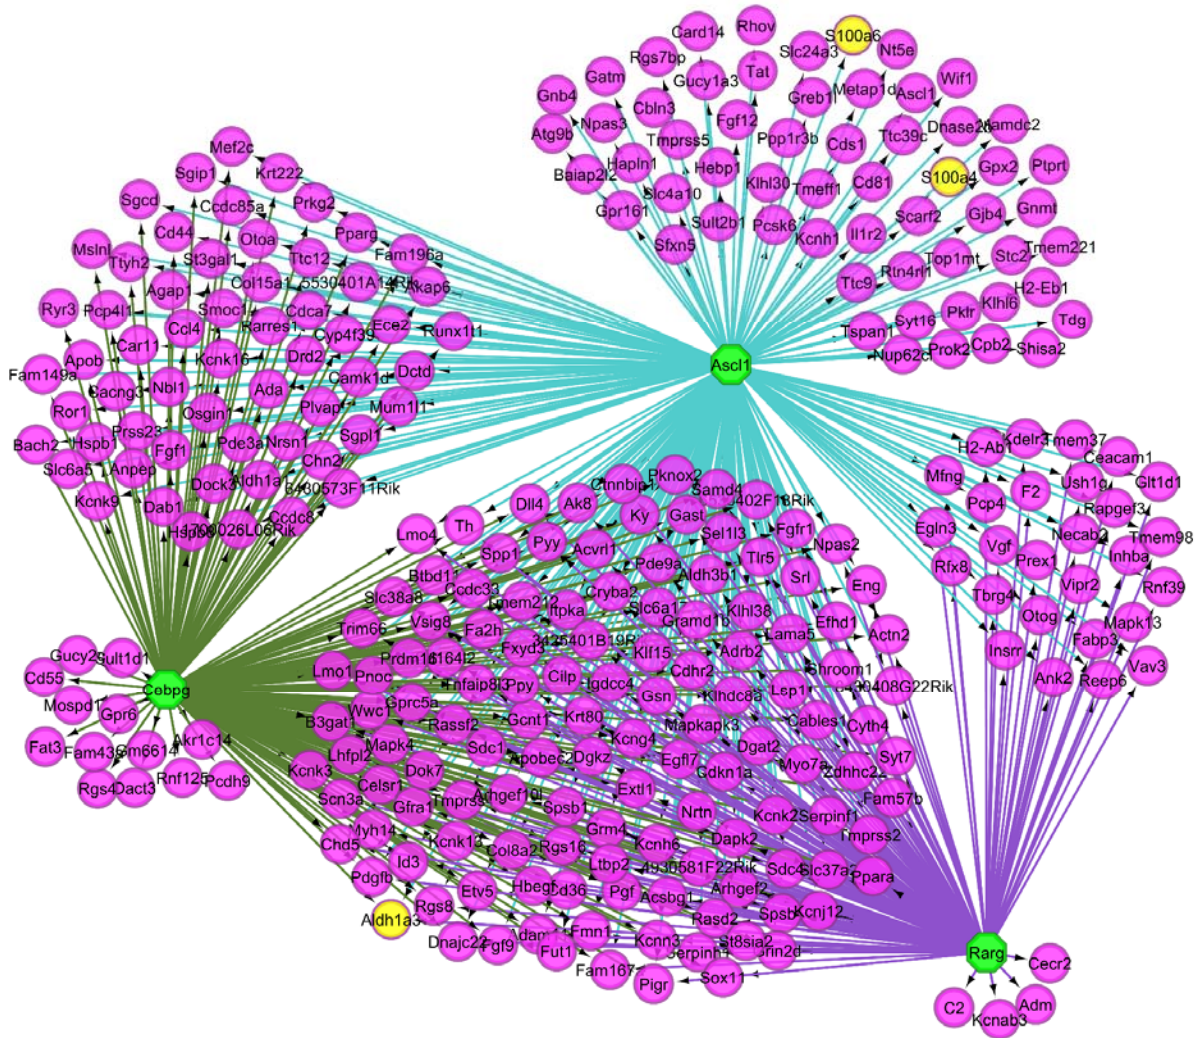

SUPPLEMENTARY DATA

**Supplementary Figure 7. iRegulon-predicted network of regulators of the top 500 downregulated genes in *Abcc8*<sup>-/-</sup> β-cells.** Map depicting the top 3 predicted regulators (green octagons) and their predicted target genes (magenta circles).

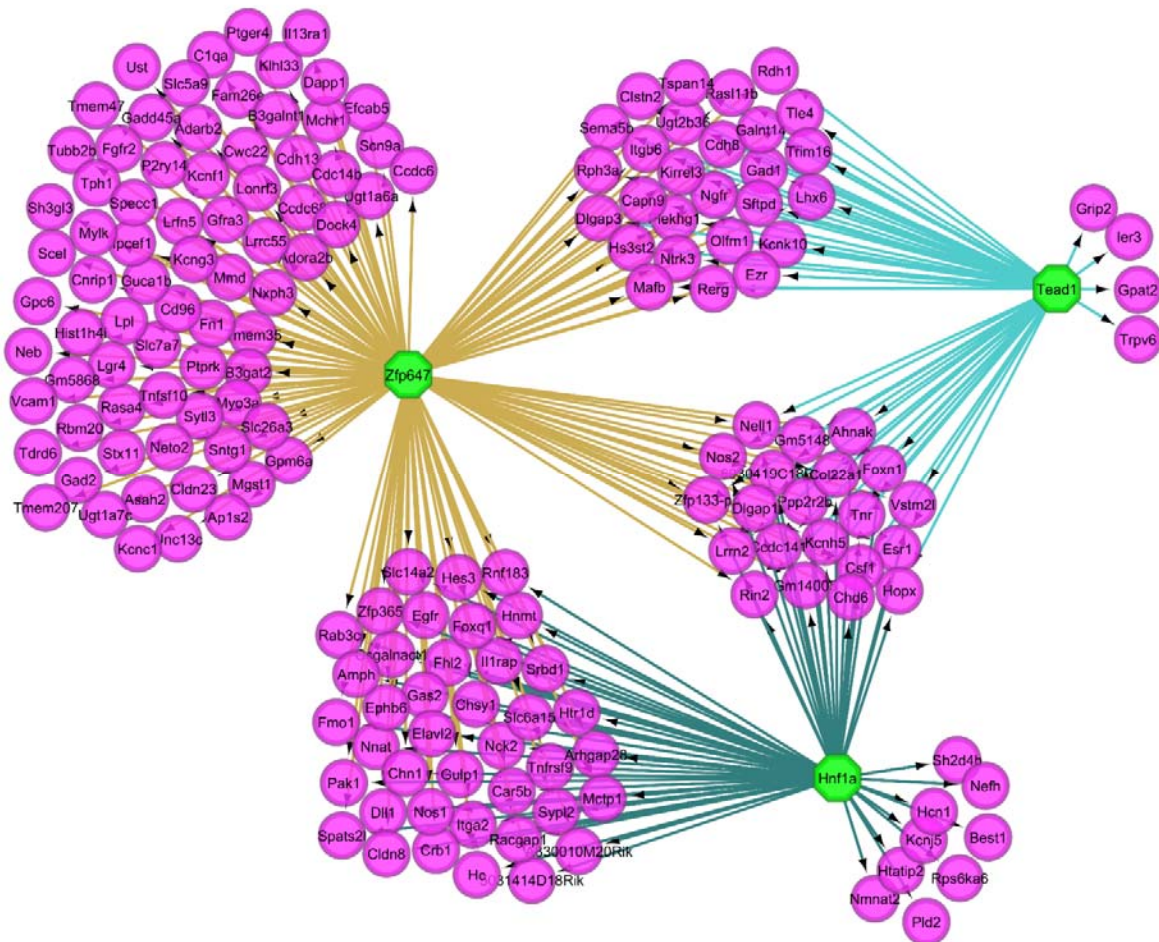

## SUPPLEMENTARY DATA

**Supplemental Table 1. Differential expression analysis.** Results of differential expression analysis using 4 *Abcc8*<sup>-/-</sup>; *MIP-GFP* and 4 *Abcc8*<sup>+/+</sup>; *MIP-GFP* samples. Genes are identified by MGI Symbol, Ensembl ID, and Entrez gene ID, and are categorized by MGI biotype. Log<sub>2</sub>[Fold Change (KO vs. WT)], p-value (Wald test), and padj (p-value adjusted for Benjamini and Hochberg's False Discovery Rate), and the raw counts for each of the 8 samples are included for each gene.

**Supplemental Table 2. Predicted regulators and targets of the top 500 most upregulated genes in *Abcc8*<sup>-/-</sup>β-cells.** Complete list of iRegulon-predicted target genes for each of the top 3 regulators (ASCL1, RARG, and CEBPG).

**Supplemental Table 3. Predicted regulators and targets of the top 500 most downregulated genes in *Abcc8*<sup>-/-</sup>β-cells.** Complete list of iRegulon-predicted target genes for each of the top 3 regulators (TEAD1, HNF1A, and ZFP647).

SUPPLEMENTARY DATA

**Link to Online Supplemental Tables**

<https://www.dropbox.com/sh/xxe96rmlD086gyf/AADUd7WfCsQFTaI5EZvu1hSYa?dl=0>
